# Supplementary material
Source: PubMed Central journal article supplement (PMC1927091)
Supplement: bjpg56-836TableS1.pdf [file bjpg56-836TableS1.pdf]

**Supplementary Table 1. Distribution of list-size and prevalence by deciles of deprivation.**

| Deprivation decile | Number of practices | Mean SIOD income score <sup>a</sup> | Mean list size | Mean prevalence (%) |        |              |          |      |          |                |        |               |        |
|--------------------|---------------------|-------------------------------------|----------------|---------------------|--------|--------------|----------|------|----------|----------------|--------|---------------|--------|
|                    |                     |                                     |                | CHD                 | Stroke | Hypertension | Diabetes | COPD | Epilepsy | Hypothyroidism | Cancer | Mental health | Asthma |
| 1 (affluent)       | 90                  | 5.3                                 | 5728           | 3.90                | 1.76   | 11.42        | 2.75     | 1.06 | 0.53     | 3.08           | 0.59   | 0.47          | 4.89   |
| 2                  | 88                  | 8.1                                 | 4927           | 4.28                | 1.84   | 12.25        | 3.09     | 1.34 | 0.63     | 3.22           | 0.56   | 0.50          | 5.47   |
| 3                  | 89                  | 9.8                                 | 4805           | 4.43                | 1.79   | 12.09        | 3.17     | 1.53 | 0.65     | 3.11           | 0.55   | 0.49          | 5.33   |
| 4                  | 91                  | 11.4                                | 5729           | 4.49                | 1.78   | 12.02        | 3.32     | 1.63 | 0.69     | 2.99           | 0.52   | 0.62          | 5.54   |
| 5                  | 90                  | 13.2                                | 5681           | 4.59                | 1.87   | 12.01        | 3.33     | 1.70 | 0.69     | 3.01           | 0.55   | 0.57          | 5.36   |
| 6                  | 91                  | 15.5                                | 6047           | 4.95                | 1.86   | 12.27        | 3.53     | 2.02 | 0.73     | 2.86           | 0.55   | 0.57          | 5.33   |
| 7                  | 91                  | 17.9                                | 5173           | 5.14                | 1.87   | 12.49        | 3.65     | 2.18 | 0.75     | 2.92           | 0.51   | 0.60          | 5.54   |
| 8                  | 90                  | 20.2                                | 6127           | 4.77                | 1.68   | 11.01        | 3.34     | 2.10 | 0.79     | 2.95           | 0.48   | 0.61          | 5.30   |
| 9                  | 91                  | 23.8                                | 4677           | 4.87                | 1.80   | 11.78        | 3.49     | 2.61 | 0.80     | 2.49           | 0.47   | 0.59          | 5.42   |
| 10 (deprived)      | 90                  | 33.9                                | 4114           | 5.22                | 1.99   | 11.99        | 3.45     | 3.50 | 0.95     | 2.12           | 0.49   | 0.71          | 5.41   |

<sup>a</sup>Each one point increase represents a one percent increase in the percentage of the registered population receiving state benefits on the grounds of low income.
